# Supplementary material for: A direct experimental test of Ohno’s hypothesis
Source: eLife. 2025 Apr 2;13:RP97216. doi: 10.7554/eLife.97216 (PMC11964449; doi:10.7554/eLife.97216)
Supplement: Figure 2—source data 1. [file elife-97216-fig2-data1.xlsx]

## Sheet: Fig2
Generation	Replicate	Copy number	Fraction of positives	Mean xyz
1	X	single	0.252376	0.263613
1	Y	single	0.268974
1	Z	single	0.269489
2	X	single	0.206079	0.184109
2	Y	single	0.178476
2	Z	single	0.167771
3	X	single	0.25465	0.262793
3	Y	single	0.275638
3	Z	single	0.258091
4	X	single	0.277944	0.306308
4	Y	single	0.298695
4	Z	single	0.342284
5	X	single	0.405748	0.412978
5	Y	single	0.416194
5	Z	single	0.416993
1	X	double	0.403747	0.410996
1	Y	double	0.402916
1	Z	double	0.426326
2	X	double	0.456102	0.360598
2	Y	double	0.322251
2	Z	double	0.303441
3	X	double	0.325254	0.307905
3	Y	double	0.288655
3	Z	double	0.309806
4	X	double	0.325841	0.34082
4	Y	double	0.363418
4	Z	double	0.333201
5	X	double	0.503472	0.46815
5	Y	double	0.431564
5	Z	double	0.469413

## Sheet: Fig2_statistics
Generation	Mann-Whitney tsest, p-values
1	0.05
2	0.05
3	0.05
4	0.2
5	0.05
