# Supplementary material for: A direct experimental test of Ohno’s hypothesis
Source: eLife. 2025 Apr 2;13:RP97216. doi: 10.7554/eLife.97216 (PMC11964449; doi:10.7554/eLife.97216)
Supplement: Figure 3—source data 1. [file elife-97216-fig3-data1.xlsx]

## Sheet: Fig3A
Median Fluorescence (all replicates pooled, log10)	Copy number	Generation
2.89559	1	0
2.8853	1	1
2.96152	1	2
3.72992	1	3
4.0163	1	4
4.35659	1	5
3.10034	2	0
2.94047	2	1
3.11488	2	2
3.86594	2	3
4.31525	2	4
4.47662	2	5
Median Fluorescence (all replicates pooled, log10)	Copy number	Replicate	Generation
2.89581	1	X	0
2.92438	1	X	1
2.94186	1	X	2
3.74063	1	X	3
3.97022	1	X	4
4.29489	1	X	5
2.89586	1	Y	0
2.86764	1	Y	1
2.96904	1	Y	2
3.72123	1	Y	3
4.01444	1	Y	4
4.5219	1	Y	5
2.89487	1	Z	0
2.87227	1	Z	1
2.9747	1	Z	2
3.72784	1	Z	3
4.06871	1	Z	4
4.2285	1	Z	5
3.10003	2	X	0
2.94077	2	X	1
3.16926	2	X	2
3.86548	2	X	3
4.24927	2	X	4
4.41	2	X	5
3.10034	2	Y	0
2.94584	2	Y	1
3.10054	2	Y	2
3.80847	2	Y	3
4.11902	2	Y	4
4.34224	2	Y	5
3.10051	2	Z	0
2.93586	2	Z	1
3.0762	2	Z	2
3.95507	2	Z	3
4.60752	2	Z	4
4.67936	2	Z	5

## Sheet: Fig3B
Median Fluorescence (all replicates pooled, log10)	Copy number	Generation
0	1	0
-0.0102836	1	1
0.0659277	1	2
0.834329	1	3
1.12071	1	4
1.461	1	5
0	2	0
-0.159869	2	1
0.0145417	2	2
0.7656	2	3
1.21491	2	4
1.37628	2	5
Median Fluorescence (all replicates pooled, log10)	Copy number	Replicate	Generation
0.000220888	1	X	0
0.0287944	1	X	1
0.0462709	1	X	2
0.845043	1	X	3
1.07463	1	X	4
1.3993	1	X	5
0.000276076	1	Y	0
-0.027944	1	Y	1
0.0734547	1	Y	2
0.825637	1	Y	3
1.11885	1	Y	4
1.62631	1	Y	5
-0.000718612	1	Z	0
-0.0233154	1	Z	1
0.0791076	1	Z	2
0.832254	1	Z	3
1.17312	1	Z	4
1.33291	1	Z	5
-0.000310354	2	X	0
-0.159571	2	X	1
0.0689268	2	X	2
0.765141	2	X	3
1.14894	2	X	4
1.30966	2	X	5
0	2	Y	0
-0.154498	2	Y	1
0.000206766	2	Y	2
0.708131	2	Y	3
1.01868	2	Y	4
1.24191	2	Y	5
0.000172319	2	Z	0
-0.164476	2	Z	1
-0.0241327	2	Z	2
0.854731	2	Z	3
1.50718	2	Z	4
1.57903	2	Z	5

## Sheet: Fig3A_statistics
Generation	Mann-Whitney test, p-values
0	0.000205
1	0.002
2	2.06e-05
3	2.06e-05
4	2.06e-05
5	0.0313

## Sheet: Fig3B_statistics
Generation	Mann-Whitney test, p-values
0	0.638
1	2.05e-05
2	0.00937
3	0.0807
4	0.634
5	0.0385
