# Supplementary material for: A direct experimental test of Ohno’s hypothesis
Source: eLife. 2025 Apr 2;13:RP97216. doi: 10.7554/eLife.97216 (PMC11964449; doi:10.7554/eLife.97216)
Supplement: Figure 4—source data 1. [file elife-97216-fig4-data1.xlsx]

## Sheet: Fig4
Generation	Replicate	Copy number	Mutations	Mean xyz
0	X.Active	single	0
0	Y.Active	single	0
0	Z.Active	single	0
0	X.Copy.1	double	0
0	Y.Copy.1	double	0
0	Z.Copy.1	double	0
0	X.Copy.2	double	0
0	Y.Copy.2	double	0
0	Z.Copy.2	double	0
1	X.Active	single	0.434	0.455
1	Y.Active	single	0.473
1	Z.Active	single	0.458
1	X.Copy.1	double	0.83	0.827
1	Y.Copy.1	double	0.808
1	Z.Copy.1	double	0.872
1	X.Copy.2	double	0.778
1	Y.Copy.2	double	0.826
1	Z.Copy.2	double	0.848
2	X.Active	single	0.838	0.956333
2	Y.Active	single	0.994
2	Z.Active	single	1.037
2	X.Copy.1	double	0.978	1.15533
2	Y.Copy.1	double	1.27
2	Z.Copy.1	double	1.344
2	X.Copy.2	double	1.062
2	Y.Copy.2	double	1.127
2	Z.Copy.2	double	1.151
3	X.Active	single	1.649	1.794
3	Y.Active	single	1.944
3	Z.Active	single	1.789
3	X.Copy.1	double	1.582	2.14467
3	Y.Copy.1	double	2.741
3	Z.Copy.1	double	2.296
3	X.Copy.2	double	1.646
3	Y.Copy.2	double	2.602
3	Z.Copy.2	double	2.001
4	X.Active	single	2.738	3.43567
4	Y.Active	single	3.853
4	Z.Active	single	3.716
4	X.Copy.1	double	3.456	3.34233
4	Y.Copy.1	double	4.034
4	Z.Copy.1	double	2.526
4	X.Copy.2	double	3.481
4	Y.Copy.2	double	4.208
4	Z.Copy.2	double	2.349
5	X.Active	single	4.428	3.758
5	Y.Active	single	4.503
5	Z.Active	single	2.343
5	X.Copy.1	double	4.708	4.4875
5	Y.Copy.1	double	4.793
5	Z.Copy.1	double	2.934
5	X.Copy.2	double	4.755
5	Y.Copy.2	double	5.542
5	Z.Copy.2	double	4.193

## Sheet: Fig4_statistics
Generation	Mann-Whitney test, p-values
1	0.012
2	0.048
3	0.274
4	0.643
5	0.131
