# Supplementary material for: A direct experimental test of Ohno’s hypothesis
Source: eLife. 2025 Apr 2;13:RP97216. doi: 10.7554/eLife.97216 (PMC11964449; doi:10.7554/eLife.97216)
Supplement: Figure 5—source data 1. [file elife-97216-fig5-data1.xlsx]

## Sheet: Fig5
Generation	Replicate	copy number	Avg.PW.Dist	dN:dS		Copy Type
1	X	1	0.345	0.33		active copy
1	Y	1	0.405	0.383		active copy
1	Z	1	0.427	0.377		active copy
1	Z	1	1.532	0.904		inactive copy
1	X	1	1.323	0.871		inactive copy
1	Y	1	1.373	0.893		inactive copy
1	Y	2	0.966	0.62		copy 1
1	Y	2	1.012	0.623		copy 2
1	Z	2	1.101	0.596		copy 1
1	Z	2	1.133	0.66		copy 2
1	X	2	1.077	0.626		copy 1
1	X	2	1.025	0.616		copy 2
2	X	1	0.318	0.297		active copy
2	X	1	1.633	0.796		inactive copy
2	Y	1	0.341	0.381		active copy
2	Y	1	1.548	0.913		inactive copy
2	Z	1	0.403	0.34		active copy
2	Z	1	1.895	0.971		inactive copy
2	X	2	0.361	0.588		copy 1
2	X	2	0.36	0.668		copy 2
2	Y	2	0.49	0.569		copy 1
2	Y	2	0.398	0.422		copy 2
2	Z	2	0.83	0.563		copy 1
2	Z	2	0.659	0.498		copy 2
3	X	1	0.115	0.462		active copy
3	X	1	0.553	0.984		inactive copy
3	Y	1	0.138	0.807		active copy
3	Y	1	0.53	2.378		inactive copy
3	Z	1	0.188	0.431		active copy
3	Z	1	0.712	1.106		inactive copy
3	X	2	0.221	0.495		copy 1
3	X	2	0.212	0.545		copy 2
3	Y	2	0.41	0.407		copy 1
3	Y	2	0.355	0.601		copy 2
3	Z	2	0.396	0.452		copy 1
3	Z	2	0.374	0.61		copy 2
4	X	1	0.565	0.365		active copy
4	X	1	2.807	0.81		inactive copy
4	Y	1	0.329	0.557		active copy
4	Y	1	1.074	2.274		inactive copy
4	Z	1	1.275	0.342		active copy
4	Z	1	0.589	1.069		inactive copy
4	X	2	1.93	0.504		copy 1
4	X	2	2.1	0.51		copy 2
4	Y	2	2.998	0.571		copy 1
4	Y	2	3.069	0.574		copy 2
4	Z	2	0.9	0.318		copy 1
4	Z	2	0.89	0.332		copy 2
5	X	1	0.455	0.589		active copy
5	X	1	1.577	0.935		inactive copy
5	Y	1	1.246	0.273		active copy
5	Y	1	4.107	1.041		inactive copy
5	Z	1	0.486	0.332		active copy
5	Z	1	2.182	1.151		inactive copy
5	X	2	0.975	0.479		copy 1
5	X	2	0.83	0.494		copy 2
5	Y	2	1.304	0.675		copy 1
5	Y	2	1.087	0.776		copy 2
5	Z	2	1.268	0.488		copy 1
5	Z	2	0.776	0.324		copy 2

## Sheet: Fig5_statistics
Figure 5A
Generation	Mann-Whitney test, p-values
1	0.05
2	0.05
3	0.05
4	0.2
5	0.05
Figure 5B
Generation	Mann-Whitney test, p-values
1	0.012
2	0.083
3	0.012
4	0.048
5	0.131
Figure 5C
Generation	Mann-Whitney test, p-values
1	0.05
2	0.05
3	0.05
4	0.1
5	0.65
Figure 5D
Generation	Mann-Whitney test, p-values
1	0.012
2	0.012
3	0.131
4	0.357
5	0.81
