# Supplementary material for: A direct experimental test of Ohno’s hypothesis
Source: eLife. 2025 Apr 2;13:RP97216. doi: 10.7554/eLife.97216 (PMC11964449; doi:10.7554/eLife.97216)
Supplement: Figure 6—source data 1. [file elife-97216-fig6-data1.xlsx]

## Sheet: Fig6
Mutation	Copy number	Replicate	Generation	Frequency (%)
G147S	1	X	1	0.384843
G147S	1	Y	1	0.111576
G147S	1	Z	1	0.437318
G147S	1	X	2	0.506004
G147S	1	Y	2	0.223812
G147S	1	Z	2	0.72983
G147S	1	X	3	0.212215
G147S	1	Y	3	0
G147S	1	Z	3	0.0719195
G147S	1	X	4	9.20415
G147S	1	Y	4	0.453515
G147S	1	Z	4	7.8853
G147S	1	X	5	69.6168
G147S	1	Y	5	1.83486
G147S	1	Z	5	5.57851
L98M	1	X	1	0.53286
L98M	1	Y	1	0.69735
L98M	1	Z	1	0.680272
L98M	1	X	2	3.51182
L98M	1	Y	2	4.89988
L98M	1	Z	2	6.28317
L98M	1	X	3	0.967701
L98M	1	Y	3	4.26651
L98M	1	Z	3	14.0483
L98M	1	X	4	1.79931
L98M	1	Y	4	5.44218
L98M	1	Z	4	10.7527
L98M	1	X	5	45.6143
L98M	1	Y	5	7.79817
L98M	1	Z	5	10
V162D	1	X	1	0.0592066
V162D	1	Y	1	0.111576
V162D	1	Z	1	0.194363
V162D	1	X	2	1.9787
V162D	1	Y	2	3.40114
V162D	1	Z	2	1.81131
V162D	1	X	3	93.4638
V162D	1	Y	3	92.135
V162D	1	Z	3	76.9778
V162D	1	X	4	99.7232
V162D	1	Y	4	99.4104
V162D	1	Z	4	93.19
V162D	1	X	5	99.7625
V162D	1	Y	5	98.9908
V162D	1	Z	5	97.1901
G147S+V162D	1	X	1	0
G147S+V162D	1	Y	1	0
G147S+V162D	1	Z	1	0
G147S+V162D	1	X	2	0
G147S+V162D	1	Y	2	0
G147S+V162D	1	Z	2	0
G147S+V162D	1	X	3	0
G147S+V162D	1	Y	3	0
G147S+V162D	1	Z	3	0.0159821
G147S+V162D	1	X	4	9.20415
G147S+V162D	1	Y	4	0.453515
G147S+V162D	1	Z	4	7.8853
G147S+V162D	1	X	5	69.601
G147S+V162D	1	Y	5	1.83486
G147S+V162D	1	Z	5	5.57851
L98M+G147S	1	X	1	0
L98M+G147S	1	Y	1	0
L98M+G147S	1	Z	1	0
L98M+G147S	1	X	2	0.120837
L98M+G147S	1	Y	2	0
L98M+G147S	1	Z	2	0.00663482
L98M+G147S	1	X	3	0
L98M+G147S	1	Y	3	0
L98M+G147S	1	Z	3	0.0479463
L98M+G147S	1	X	4	0
L98M+G147S	1	Y	4	0
L98M+G147S	1	Z	4	0
L98M+G147S	1	X	5	45.2027
L98M+G147S	1	Y	5	0.642202
L98M+G147S	1	Z	5	0.123967
L98M+V162D	1	X	1	0
L98M+V162D	1	Y	1	0
L98M+V162D	1	Z	1	0
L98M+V162D	1	X	2	0
L98M+V162D	1	Y	2	0.0879261
L98M+V162D	1	Z	2	0
L98M+V162D	1	X	3	0
L98M+V162D	1	Y	3	0.525771
L98M+V162D	1	Z	3	0.0559374
L98M+V162D	1	X	4	1.79931
L98M+V162D	1	Y	4	5.07937
L98M+V162D	1	Z	4	5.73477
L98M+V162D	1	X	5	45.5985
L98M+V162D	1	Y	5	7.70642
L98M+V162D	1	Z	5	9.66942
L98M+G147S+V162D	1	X	1	0
L98M+G147S+V162D	1	Y	1	0
L98M+G147S+V162D	1	Z	1	0
L98M+G147S+V162D	1	X	2	0
L98M+G147S+V162D	1	Y	2	0
L98M+G147S+V162D	1	Z	2	0
L98M+G147S+V162D	1	X	3	0
L98M+G147S+V162D	1	Y	3	0
L98M+G147S+V162D	1	Z	3	0
L98M+G147S+V162D	1	X	4	0
L98M+G147S+V162D	1	Y	4	0
L98M+G147S+V162D	1	Z	4	0
L98M+G147S+V162D	1	X	5	45.2027
L98M+G147S+V162D	1	Y	5	0.642202
L98M+G147S+V162D	1	Z	5	0.123967
G147S	2	X	1	0.522876
G147S	2	Y	1	0.237389
G147S	2	Z	1	0.534045
G147S	2	X	2	3.46894
G147S	2	Y	2	1.07538
G147S	2	Z	2	2.01123
G147S	2	X	3	5.54751
G147S	2	Y	3	3.29061
G147S	2	Z	3	6.86501
G147S	2	X	4	9.17659
G147S	2	Y	4	1.26437
G147S	2	Z	4	0.554017
G147S	2	X	5	17.2074
G147S	2	Y	5	12.9829
G147S	2	Z	5	2.6971
L98M	2	X	1	0.392157
L98M	2	Y	1	1.36499
L98M	2	Z	1	0.934579
L98M	2	X	2	7.18307
L98M	2	Y	2	3.70528
L98M	2	Z	2	4.50013
L98M	2	X	3	10.0812
L98M	2	Y	3	8.29029
L98M	2	Z	3	6.16397
L98M	2	X	4	54.9603
L98M	2	Y	4	20
L98M	2	Z	4	6.5097
L98M	2	X	5	85.131
L98M	2	Y	5	11.1332
L98M	2	Z	5	3.50721
V162D	2	X	1	1.17647
V162D	2	Y	1	0.296736
V162D	2	Z	1	0
V162D	2	X	2	5.84817
V162D	2	Y	2	9.16738
V162D	2	Z	2	5.30462
V162D	2	X	3	89.0235
V162D	2	Y	3	93.7759
V162D	2	Z	3	86.8428
V162D	2	X	4	99.1567
V162D	2	Y	4	98.7356
V162D	2	Z	4	93.952
V162D	2	X	5	99.2292
V162D	2	Y	5	99.2742
V162D	2	Z	5	96.5916
G147S+V162D	2	X	1	0.130719
G147S+V162D	2	Y	1	0
G147S+V162D	2	Z	1	0
G147S+V162D	2	X	2	0
G147S+V162D	2	Y	2	0
G147S+V162D	2	Z	2	0
G147S+V162D	2	X	3	0
G147S+V162D	2	Y	3	0
G147S+V162D	2	Z	3	0
G147S+V162D	2	X	4	8.73016
G147S+V162D	2	Y	4	0.689655
G147S+V162D	2	Z	4	0
G147S+V162D	2	X	5	17.1762
G147S+V162D	2	Y	5	12.9127
G147S+V162D	2	Z	5	2.41059
L98M+G147S	2	X	1	0
L98M+G147S	2	Y	1	0
L98M+G147S	2	Z	1	0
L98M+G147S	2	X	2	0
L98M+G147S	2	Y	2	0
L98M+G147S	2	Z	2	0
L98M+G147S	2	X	3	0
L98M+G147S	2	Y	3	2.92711
L98M+G147S	2	Z	3	0
L98M+G147S	2	X	4	1.88492
L98M+G147S	2	Y	4	0.689655
L98M+G147S	2	Z	4	0
L98M+G147S	2	X	5	6.09864
L98M+G147S	2	Y	5	4.23788
L98M+G147S	2	Z	5	0
L98M+V162D	2	X	1	0
L98M+V162D	2	Y	1	0
L98M+V162D	2	Z	1	0
L98M+V162D	2	X	2	0
L98M+V162D	2	Y	2	0
L98M+V162D	2	Z	2	0.0586609
L98M+V162D	2	X	3	7.84727
L98M+V162D	2	Y	3	4.0176
L98M+V162D	2	Z	3	1.97487
L98M+V162D	2	X	4	54.6627
L98M+V162D	2	Y	4	19.4253
L98M+V162D	2	Z	4	0.0461681
L98M+V162D	2	X	5	84.2977
L98M+V162D	2	Y	5	10.9459
L98M+V162D	2	Z	5	0.118554
L98M+G147S+V162D	2	X	1	0
L98M+G147S+V162D	2	Y	1	0
L98M+G147S+V162D	2	Z	1	0
L98M+G147S+V162D	2	X	2	0
L98M+G147S+V162D	2	Y	2	0
L98M+G147S+V162D	2	Z	2	0
L98M+G147S+V162D	2	X	3	0
L98M+G147S+V162D	2	Y	3	0
L98M+G147S+V162D	2	Z	3	0
L98M+G147S+V162D	2	X	4	1.88492
L98M+G147S+V162D	2	Y	4	0.574713
L98M+G147S+V162D	2	Z	4	0
L98M+G147S+V162D	2	X	5	6.09343
L98M+G147S+V162D	2	Y	5	4.23788
L98M+G147S+V162D	2	Z	5	0
