# Supplementary material for: A direct experimental test of Ohno’s hypothesis
Source: eLife. 2025 Apr 2;13:RP97216. doi: 10.7554/eLife.97216 (PMC11964449; doi:10.7554/eLife.97216)
Supplement: Source data 1. — Number of reads sequenced by SMRT sequencing and mean number of amino-acid changes per cogfp gene. X, Y, Z: replicate populations. 1–5: generations of evolution. [file elife-97216-data1.xlsx]

## Sheet: Sheet1
Single-copy populations
	mean number of amino acid changes		number of reads	mean number of amino acid changes		number of reads	mean number of amino acid changes		number of reads
Starting	X	1.989	3379	Y	1.9	707	Z	1.869	4610
Libraries
GREEN	X active copy	X inactive copy		Y active copy	Y inactive copy		Z active copy	Z inactive copy
1	0.434	1.08	3378	0.473	1.052	3585	0.458	1.102	2058
2	0.838	2.423	13241	0.994	2.54	25021	1.037	2.675	15072
3	1.649	4.006	23561	1.944	3.422	23204	1.789	3.386	12514
4	2.738	5.576	1445	3.853	2.926	2205	3.716	2.062	279
5	4.428	6.109	6316	4.503	4.451	1090	2.343	5.577	2420
GREEN ONLY
1	1.189	1.312	1869	1.592	1.367	4324	1.325	1.316	3041
2	1.806	2.861	2028	2.381	2.15	955	1.911	2.715	1607
3	2.72	3.957	940	3.257	3.509	805	2.55	3.659	1262
4	4.139	5.452	820	4.122	3.764	1606	3.138	2.593	904
5	5.176	7.513	5986	4.715	4.201	9848	4.318	2.48	8358
BLUE
1	0.428	1.053	3183	0.383	1.021	994	0.417	1.067	1730
2	0.954	2.234	25768	0.926	2.164	8096	0.973	2.375	21774
3	1.787	4.96	21638	2.08	3.731	26241	2.161	2.204	29250
4	2.72	5.815	1100	3.573	4.084	1122	2.362	2.979	1152
5	3.584	6.742	10493	4.919	4.973	16071	3.267	4.794	5743
BLUE ONLY
1	1.077	0.941	2380	0.893	1	2287	0.807	0.987	2943
2	1.504	2.249	32035	1.231	2.167	33968	1.16	1.91	35922
3	2.456	2.68	14421	2.419	3.89	9838	1.728	2.451	24708
4	3.068	2.391	948	3.225	5.563	1005	1.896	2.996	2186
5	3.447	3.193	10725	3.935	8.152	10294	2.864	3.899	5941
GREEN AND BLUE
1	0.431	1.032	2827	0.435	1.009	3118	0.41	1.025	3672
2	1.078	2.396	1290	1.293	2.236	1168	1.005	2.386	1543
3	2.124	2.96	1656	2.695	2.83	2049	2.714	3.818	1195
4	4.029	2.571	1129	3.139	4.138	2132	4.575	5.848	1243
5	4.389	3.307	7124	3.706	5.033	11701	5.209	8.884	8003
Double-copy populations
	mean number of		number of reads	mean number of		number of reads	mean number of		number of reads
	amino acid changes			amino acid changes			amino acid changes
Starting	X	2.009	1494	Y	1.997	4061	Z	2.058	1083
Libraries
GREEN	X copy 1	X copy 2		Y copy 1	Y copy 2		Z copy 1	Z copy 2
1	0.83	0.778	765	0.808	0.826	1685	0.872	0.848	749
2	0.978	1.062	11012	1.27	1.127	18784	1.344	1.151	11933
3	1.582	1.646	22785	2.741	2.602	15681	2.296	2.001	11697
4	3.456	3.481	2016	4.034	4.208	870	2.526	2.349	2166
5	4.708	4.755	19201	4.793	5.542	8542	2.934	4.193	10122
GREEN ONLY
1	1.488	1.456	2754	1.44	1.46	2553	1.421	1.412	1278
2	1.77	1.879	861	1.915	1.978	2442	2.076	2.057	3016
3	3.185	3.112	720	3.121	3.043	769	3.687	3.766	1172
4	4.987	5.024	2860	4.418	4.295	1937	4.956	4.819	2130
5	5.876	5.649	9495	5.888	5.897	4528	6.424	5.762	16576
BLUE
1	0.791	0.77	3143	0.768	0.781	1451	0.825	0.826	1905
2	1.359	1.052	27650	1.485	1.103	10375	1.329	1.011	13705
3	2.421	1.81	13949	3.113	2.341	16774	2.447	1.873	16611
4	3.673	4.053	1381	4.36	4.286	2428	3.229	3.304	3389
5	9.067	4.654	7046	5.999	4.949	12312	5.55	4.78	16739
BLUE ONLY
1	1.218	1.185	2771	1.261	1.211	1263	1.277	1.297	1536
2	2.146	1.644	27424	2.346	1.728	14607	2.285	1.666	14189
3	3.149	2.124	11041	3.529	2.822	11402	3.837	3.339	10382
4	3.637	3.28	3063	3.408	2.969	1577	4.907	4.936	2177
5	4.765	3.136	10307	4.712	3.615	4924	6.016	5.109	8487
GREEN AND BLUE
1	0.792	0.828	1819	0.801	0.818	1283	0.755	0.78	1430
2	1.309	1.286	1004	1.108	1.141	2907	1.113	1.156	2318
3	1.914	1.986	1347	1.979	1.983	1071	2.433	2.462	790
4	3.08	3.174	1925	4.524	4.449	2395	4.199	4.259	2600
5	4.495	3.773	8131	7.478	4.66	9477	6.021	4.349	6450
